# Supplementary material
Source: publisher figshare collection journal article supplement (https://rs.figshare.com/ndownloader/files/24208445)
Supplement: Supplementary file 1 [file 24208445]

**Data accessibility:** The datasets used in this study are deposited in the Dryad repository (doi:10.5061/dryad.nvx0k6dnh).

**Authors’ contributions:** VB collected and analysed the data, and wrote the manuscript with KK. KK designed and coordinated the research, and collected specimens with VB. All authors gave final approval for publication and agree to be held accountable for the work performed therein.

**Competing interests:** We declare we have no competing interests.

**Ethical statement:** No ethical clearance was needed for this study on insects. Wild-caught samples were obtained largely from the NCBS campus/field stations and private lands, and from wildlife sanctuaries and national parks in India under the following research and collection permits issued by the state forest departments in Karnataka (permit no. 227/2014-2015, dated 2015/04/16), Kerala (permit no. WL 10-3781/2012, dated 18/12/2012, and GO (RT) No. 376/2012/F and WLD dated 26/07/2012), Goa (permit no. 2/21/GEN/WL and ET(S)/2013-14/387, dated 2013/06/20), Meghalaya (permit no. FWC/G/173/Pt-II/474-83, dated 27/05/2014), Arunachal Pradesh (permit no. CWL/G/13(95)/2011-12/Pt-III/2466-70, dated 16/02/2015), and West Bengal (permit no. 2115(9)/WL/4K-1/13/BL41, dated 2013/11/06; and permit no. 1107/42/2W-705/18, dated 2018/05/07), for which we thank the Principal Chief Conservator of Forest, Deputy Conservators of Forest, Wildlife Wardens and field officers of those states.
